# Supplementary material for: 355 nm Nanosecond Ultraviolet Pulsed Laser Annealing Effects on Amorphous In-Ga-ZnO Thin Film Transistors
Source: Micromachines (Basel). 2024 Jan 5;15(1):103. doi: 10.3390/mi15010103 (PMC10818844; doi:10.3390/mi15010103)
Supplement: Supplementary file 1 [file micromachines-15-00103-s001.zip › micromachines-2785154-supplementary.pdf]

Article

# 355 nm Nanosecond Ultraviolet Pulsed Laser Annealing Effects on Amorphous In-Ga-ZnO Thin Film Transistors

Sang Yeon Park <sup>1,†</sup>, Younggon Choi <sup>1,†</sup>, Yong Hyeok Seo <sup>1</sup>, Hojun Kim <sup>2</sup>, Dong Hyun Lee <sup>1</sup>, Phuoc Loc Truong <sup>2</sup>, Yongmin Jeon <sup>3</sup>, Hocheon Yoo <sup>1</sup>, Sang Jik Kwon <sup>1</sup>, Daeho Lee <sup>2,\*</sup>, and Eou-Sik Cho <sup>1,\*</sup>

<sup>1</sup> Department of Electronics Engineering, Gachon University, 1342 Seongnam-daero, Soojung-gu, Seongnam City, Gyeonggi-do, 13120, South Korea ; tkdus9@gachon.ac.kr (S. Y. P.) ; cyg1994@gachon.ac.kr (Y. C.) ; danny99hodam@gachon.ac.kr (D. H. L.) ; hyoo@gachon.ac.kr (H. Y.) ; sjkwon@gachon.ac.kr (S. J. K.) ; es.cho@gachon.ac.kr (E.-S. C.)

<sup>2</sup> Department of Mechanical Engineering, Gachon University, 1342 Seongnam-daero, Soojung-gu, Seongnam City, Gyeonggi-do, 13120, South Korea ; fahenz@gachon.ac.kr (H. K.) ; 202050078@gachon.ac.kr (P. L. T.) ; dhl@gachon.ac.kr (D. L.)

<sup>3</sup> Department of Biomedical Engineering, Gachon University, 1342 Seongnam-daero, Soojung-gu, Seongnam City, Gyeonggi-do, 13120, South Korea; yongmin@gachon.ac.kr (Y. J.)

\* Correspondence: dhl@gachon.ac.kr (D. L.) ; es.cho@gachon.ac.kr (E.-S. C.)

† These authors contributed equally to this work.

## Supplementary Figures.

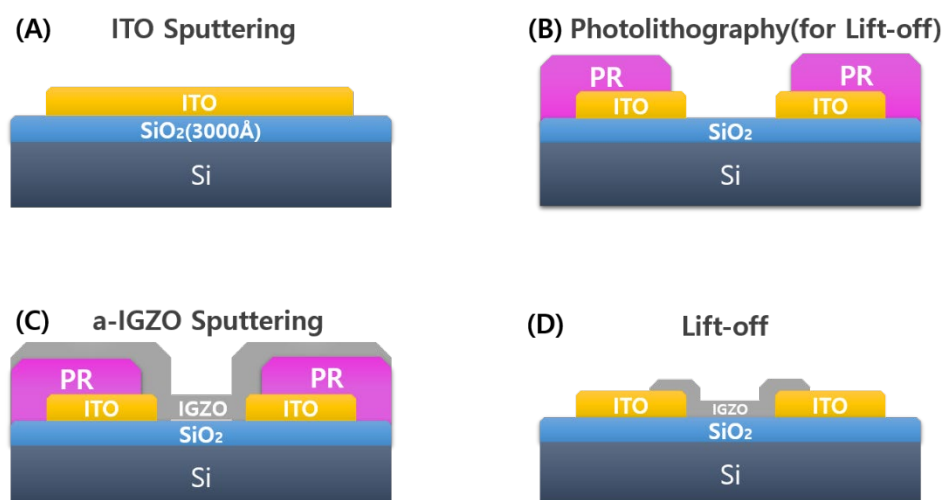

**Figure S1.** Fabrication process of an a-IGZO/ITO TFT (a) ITO sputtering and patterning (b) photolithography for lift-off (c) a-IGZO sputtering (d) Lift-off.

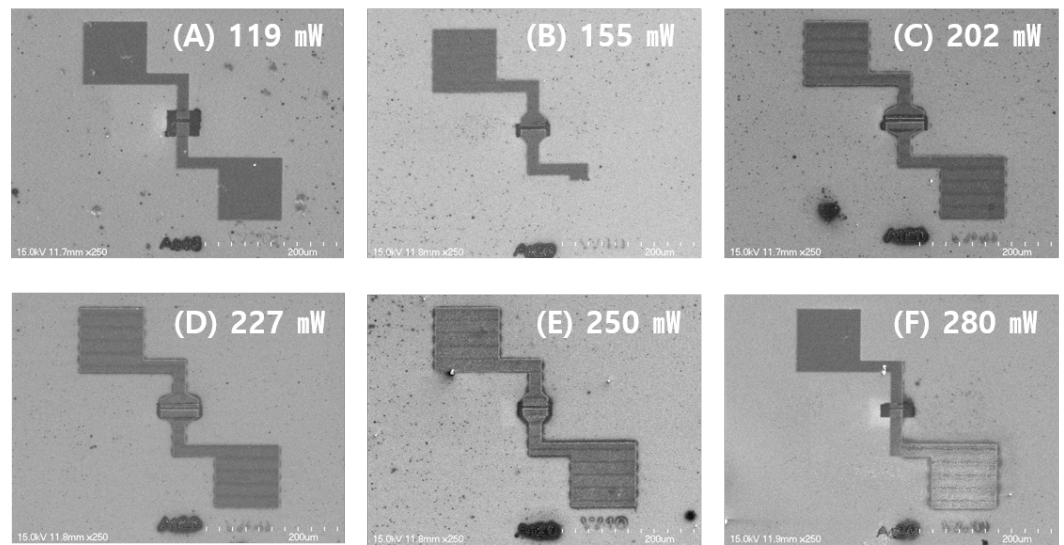

**Figure S2.** SEM images of a-IGZO TFTs after a 355 nm UV pulsed laser annealing process for laser powers of (a) 119 mW, (b) 155 mW, (c) 202 mW, (d) 227 mW, (e) 250 mW, and (f) 280 mW.

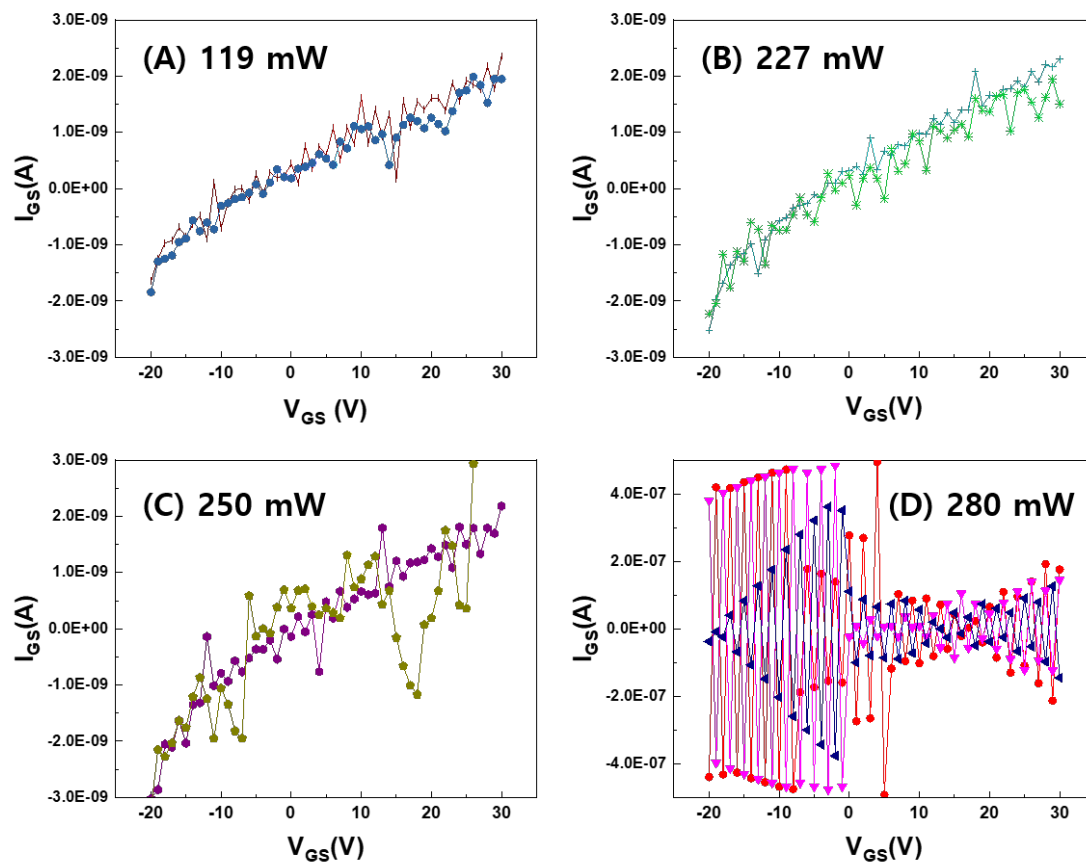

**Figure S3.** Gate-Source leakage currents of a-IGZO TFTs after a 355 nm UV pulsed laser annealing process for laser powers of (a) 119 mW, (b) 227 mW, (c) 250 mW, and (d) 280 mW.

• X-ray photoelectron spectroscopy (XPS) analysis of laser-annealed a-IGZO thin films with various laser powers.

The X-ray Photoelectron Spectroscopy (XPS) data for these films revealed the following trends: as the laser power increased from 0 to 120 mW, there was a noticeable increase in lattice oxygen, suggesting enhanced crystallization in the a-IGZO thin films. However, at an excessive laser power of 280 mW, the lattice oxygen content decreased. Concurrently, the presence of non-lattice oxygen – which arises from surface oxidation – escalated as the laser power increased from 0 to 280 mW. This indicates that the a-IGZO thin films undergo oxidation during the laser annealing process, and this oxidation appears to correlate with the laser power. According to the XPS results, there seems to be a complementary relationship between oxygen vacancies and lattice oxygen. As Table 1 demonstrates, mobility did not show a dependence on the laser power, suggesting that excess carriers might be too conductive to manifest distinct transfer characteristics. It is therefore conceivable that the crystallinity of the a-IGZO thin films is intricately linked to the performance of the laser-annealed a-IGZO TFTs.

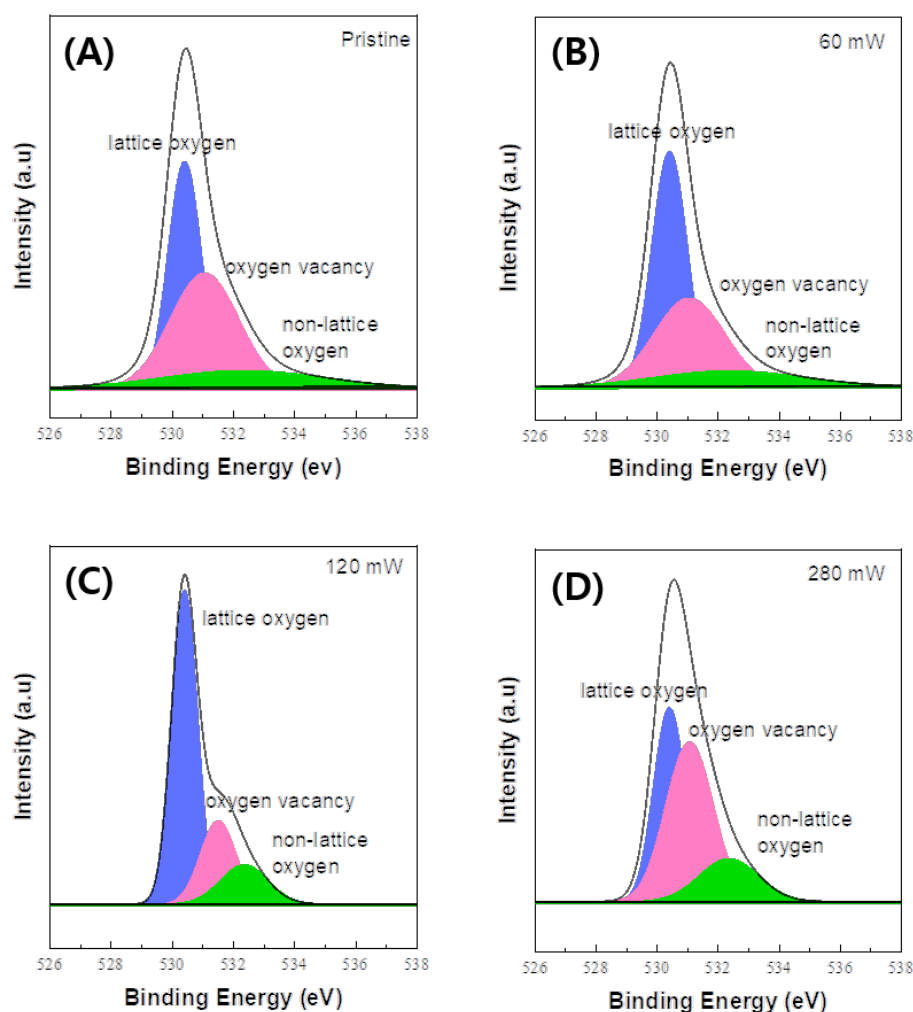

**Figure S4.** X-ray photoelectron spectroscopy (XPS) results of a-IGZO thin films after a 355 nm UV pulsed laser annealing process with laser powers of (a) 0 (pristine), (b) 60 mW, (c) 120 mW, and (d) 280 mW.
